# Supplementary material for: Copper selenide (Cu3Se2 and Cu2−xSe) thin films: electrochemical deposition and electrocatalytic application in quantum dot-sensitized solar cells
Source: Royal Society of Chemistry journal article supplement (doi:10.1039/c8dt03791d), 2018-01-01
Supplement: c8dt03791d1.pdf [file c8dt03791d1.pdf]

## Electronic Supplementary Information (ESI)

# Copper selenide ( $\text{Cu}_3\text{Se}_2$ and $\text{Cu}_{2-x}\text{Se}$ ) thin films: electrochemical deposition and electrocatalytic application for quantum dot-sensitized solar cells

Ru Zhou,<sup>\*a</sup> Yuanzhang Huang,<sup>a</sup> Juntian Zhou,<sup>a</sup> Haihong Niu,<sup>a</sup> Lei Wan,<sup>a</sup> Yuan Li,<sup>b</sup>  
Jun Xu,<sup>\*b</sup> Jinzhang Xu<sup>a</sup>

<sup>a</sup> School of Electrical Engineering and Automation, Hefei University of Technology, Hefei 230009, P. R. China. E-mail: [zhouru@hfut.edu.cn](mailto:zhouru@hfut.edu.cn)

<sup>b</sup> School of Electronic Science and Applied Physics, Hefei University of Technology, Hefei 230009, P. R. China. E-mail: [apjunxu@hfut.edu.cn](mailto:apjunxu@hfut.edu.cn)

The IPCE spectrum of A- $\text{Cu}_{2-x}\text{Se}$  CE-based CdS/CdSe QDSC is given in Fig. S1. The integrated  $J_{sc}$  value from the IPCE spectrum is  $12.48 \text{ mA/cm}^2$ , which is consistent with the  $J_{sc}$  value measured from the J-V curve ( $12.94 \text{ mA/cm}^2$ ).

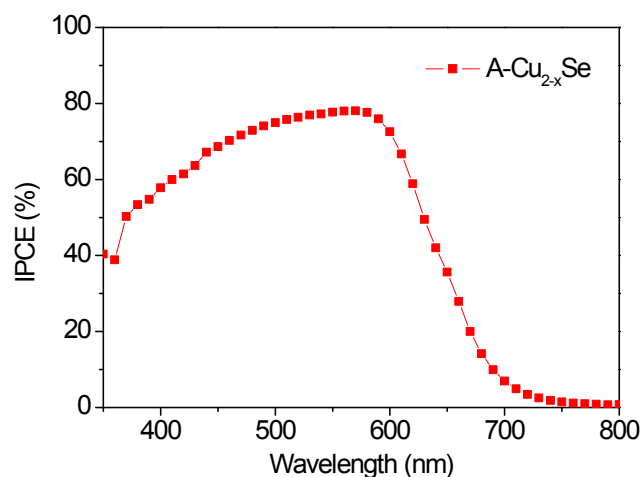

**Fig. S1.** IPCE spectrum of the A- $\text{Cu}_{2-x}\text{Se}$  CE-based CdS/CdSe QDSC.
